# Supplementary material for: Jointly Embedding Multiple Single-Cell Omics Measurements
Source: PubMed Central journal article supplement (PMC8496402; doi:10.4230/lipics.wabi.2019.10), 2019-09-03
Supplement: NIHMS1060040-supplement-1.pdf [file NIHMS1060040-supplement-1.pdf]

**A** Supplement

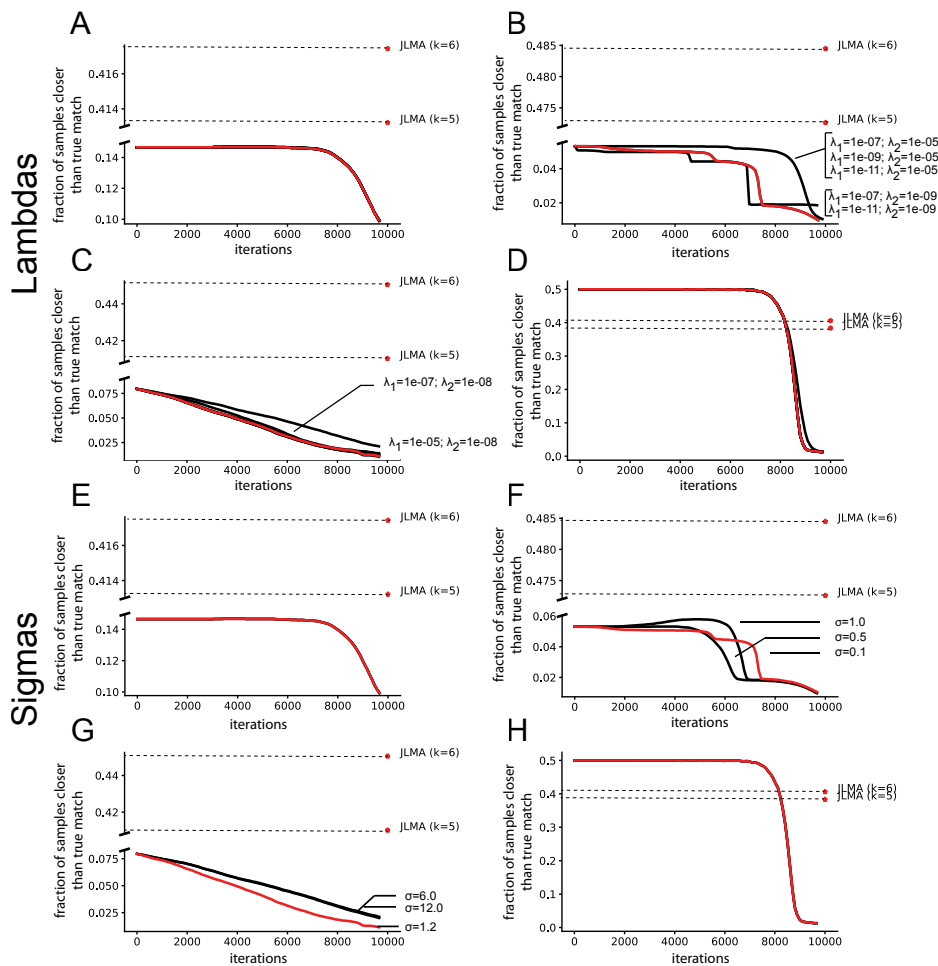

■ **Figure 3 Testing sensitivity to hyperparameters.** (A–D) The performance of MMD-MA when the trade-off parameters  $\lambda_1$  and  $\lambda_2$  are set differently in the three numerical simulations and the one real-world application, respectively. In each case, eight settings were chosen, and the plot only shows curves (black color) that differ from the one produced by the selected parameters (red color). (E–H) The performance of MMD-MA when  $\sigma$  is set differently in the three numerical simulations and the one real-world application, respectively. Again, only settings that yield results different from the selected results are shown.

■ Table 3 Hyperparameter values investigated for each data set.

| Data set     | $\lambda_1$ | $\lambda_2$ |
|--------------|-------------|-------------|
| Simulation 1 | 1e-04       | 1           |
|              | 1e-04       | 1e-02       |
|              | 1e-04       | 1e-04       |
|              | 1e-06       | 1           |
|              | 1e-06       | 1e-02       |
|              | 1e-06       | 1e-04       |
|              | 1e-08       | 1           |
|              | 1e-08       | 1e-02       |
|              | 1e-08       | 1e-04       |
|              | 1e-08       | 1e-04       |
| Simulation 2 | 1e-07       | 1e-05       |
|              | 1e-07       | 1e-07       |
|              | 1e-07       | 1e-09       |
|              | 1e-09       | 1e-05       |
|              | 1e-09       | 1e-07       |
|              | 1e-09       | 1e-09       |
|              | 1e-11       | 1e-05       |
|              | 1e-11       | 1e-07       |
| Simulation 3 | 1e-11       | 1e-09       |
|              | 1e-03       | 1e-04       |
|              | 1e-03       | 1e-06       |
|              | 1e-03       | 1e-08       |
|              | 1e-05       | 1e-04       |
|              | 1e-05       | 1e-06       |
|              | 1e-05       | 1e-08       |
|              | 1e-07       | 1e-04       |
|              | 1e-07       | 1e-06       |
| 1e-07        | 1e-08       |             |
| Methyl-Expr  | 1           | 1e-04       |
|              | 1           | 1e-06       |
|              | 1           | 1e-08       |
|              | 1e-02       | 1e-04       |
|              | 1e-02       | 1e-06       |
|              | 1e-02       | 1e-08       |
|              | 1e-04       | 1e-04       |
|              | 1e-04       | 1e-06       |
| 1e-04        | 1e-08       |             |
